# Supplementary material for: Flexibility of Metal-Organic Framework Tunable by Crystal Size at the Micrometer to Submillimeter Scale for Efficient Xylene Isomer Separation
Source: PubMed Central journal article supplement (PMC6946284; doi:10.34133/2019/9463719), 2019-10-17
Supplement: 9463719.f1.pdf [file 9463719.f1.pdf]

## **Supplementary Materials**

### **Flexibility of Metal-Organic Framework Tunable by Crystal Size at the Micrometer to Submillimeter Scale for Efficient Xylene Isomer Separation**

Xiao Yang, Hao-Long Zhou, Chun-Ting He, Zong-Wen Mo, Jia-Wen Ye, Xiao-Ming Chen, and Jie-Peng Zhang\*

MOE Key Laboratory of Bioinorganic and Synthetic Chemistry, School of Chemistry, Sun Yat-Sen University, Guangzhou 510275, China

\*zhangjp7@mail.sysu.edu.cn

## Table of Contents

**Table S1.** Crystal-size dependent framework flexibility reported for MOFs

**Table S2.** Crystallographic data and structure refinements.

**Table S3.** Comparison of pX adsorption selectivities reported for MOFs.

**Figure S1.** SEM images of **A**.

**Figure S2.** Crystal structure of **A**.

**Figure S3.** Detailed framework pore structures of **A** and **B**.

**Figure S4.** TG curves of **A**.

**Figure S5.** PXRD patterns of  $[\text{Cu}_2(\text{pypz})_2] \cdot 0.5\text{pX}$  after DCM extraction.

**Figure S6.** Magnified Figure 2b.

**Figure S7.** Magnified Figure 2e.

**Figure S8.** Magnified Figure 2f.

**Figure S9.** The full illustration of the proposed transformation mechanism from **B** to **C**.

**Figure S10.** Optimized structures and energies of the structural fragments involved in the transformation from **B** to **C**.

**Figure S11.** TG curves of **3B** and **3C** after adsorption of xylene isomers.

**Figure S12.** PXRD patterns of **3B** and **3C** after loaded with xylene isomers.

**Figure S13.** Adsorption kinetic profiles of **3B** and **3C** for equimolar mixture of xylene isomers.

**Figure S14.** Gas chromatography curve of the *n*-heptane solution containing equimolar mixture of xylene isomers.

**Figure S15.** Xylene selectivities of **3B** in three consecutive ad-/desorption cycles.

**Figure S16.** Xylene selectivities of **3C** in three consecutive ad-/desorption cycles.

**Figure S17.** TG curves for **1B** after immersed in equimolar mixture of xylene isomers for different times.

**Figure S18.** Xylene selectivities of **1B** in three consecutive ad-/desorption cycles.

## References

**Table S1.** Crystal-size dependent framework flexibility reported for MOFs.

| MOF                                        | crystal size range | Downsizing effect                                                                                                                         | reference |
|--------------------------------------------|--------------------|-------------------------------------------------------------------------------------------------------------------------------------------|-----------|
| [Cu <sub>2</sub> (pypz) <sub>2</sub> ]     | 500 μm ~ 1 μm      | The phase transition temperature from the metastable guest-free phase ( <b>B</b> ) to the stable guest-free phase ( <b>C</b> ) increases. | This work |
| MAF-4 (ZIF-8)                              | 15.8 μm ~ 10 nm    | The second step of gas adsorption isotherm starts at higher pressure.                                                                     | [1, 2]    |
| DUT-49                                     | 4.08 μm ~ 100 nm   | The pressure amplifications in the <i>n</i> -butane and N <sub>2</sub> adsorption isotherms gradually vanish.                             | [3]       |
| [Cu <sub>2</sub> (bdc) <sub>2</sub> (bpe)] | 700 nm ~ 50 nm     | The guest removal-induced open to close framework shrinkage gradually vanishes.                                                           | [4]       |
| DUT-8(Ni)                                  | 500 nm             | The guest removal-induced open to close framework shrinkage vanishes.                                                                     | [5]       |
| [Cu <sub>2</sub> (bdc) <sub>2</sub> (bpy)] | 160 nm ~ 50 nm     | The guest removal-induced open to close framework shrinkage gradually vanishes.                                                           | [4]       |
| [Pt(CN) <sub>4</sub> Fe(py) <sub>2</sub> ] | 16 nm              | From no adsorption to gate-opening behavior.                                                                                              | [6]       |

**Table S2.** Crystallographic data and structure refinements.

| compound                                                        | <b>A</b>                                                       | <b>B</b>                                                       | <b>C</b>                                                       |
|-----------------------------------------------------------------|----------------------------------------------------------------|----------------------------------------------------------------|----------------------------------------------------------------|
| formula                                                         | C <sub>20</sub> H <sub>17</sub> Cu <sub>2</sub> N <sub>6</sub> | C <sub>16</sub> H <sub>12</sub> Cu <sub>2</sub> N <sub>6</sub> | C <sub>16</sub> H <sub>12</sub> Cu <sub>2</sub> N <sub>6</sub> |
| FW                                                              | 468.47                                                         | 415.40                                                         | 415.40                                                         |
| <i>T</i> (K)                                                    | 150(2)                                                         | 150(2)                                                         | 150(2)                                                         |
| space group                                                     | <i>P2</i> <sub>1</sub> / <i>c</i>                              | <i>P2</i> <sub>1</sub> / <i>c</i>                              | <i>P2</i> <sub>1</sub> / <i>c</i>                              |
| <i>a</i> (Å)                                                    | 5.71894(10)                                                    | 5.3901(3)                                                      | 5.2359(1)                                                      |
| <i>b</i> (Å)                                                    | 20.3635(3)                                                     | 20.5512(6)                                                     | 15.3176(5)                                                     |
| <i>c</i> (Å)                                                    | 15.3915(2)                                                     | 15.2289(6)                                                     | 19.5258(6)                                                     |
| $\beta$ (°)                                                     | 94.0980(14)                                                    | 98.504(4)                                                      | 93.307(3)                                                      |
| <i>V</i> (Å <sup>3</sup> )                                      | 1787.88(5)                                                     | 1668.4(1)                                                      | 1563.37(8)                                                     |
| <i>Z</i>                                                        | 4                                                              | 4                                                              | 4                                                              |
| <i>D</i> <sub>c</sub> /g cm <sup>-3</sup>                       | 1.740                                                          | 1.654                                                          | 1.765                                                          |
| $\mu$ (mm <sup>-1</sup> )                                       | 3.085                                                          | 3.218                                                          | 3.435                                                          |
| reflns coll.                                                    | 15562                                                          | 12581                                                          | 10113                                                          |
| unique reflns.                                                  | 3686                                                           | 3059                                                           | 2755                                                           |
| <i>R</i> <sub>int</sub>                                         | 0.0180                                                         | 0.0478                                                         | 0.0867                                                         |
| <i>R</i> <sub>1</sub> (> 2 $\sigma$ ( <i>I</i> )) <sup>a</sup>  | 0.0279                                                         | 0.0643                                                         | 0.0669                                                         |
| <i>wR</i> <sub>2</sub> (> 2 $\sigma$ ( <i>I</i> )) <sup>b</sup> | 0.0779                                                         | 0.2005                                                         | 0.1700                                                         |
| <i>R</i> <sub>1</sub> (all data) <sup>a</sup>                   | 0.0292                                                         | 0.0724                                                         | 0.0859                                                         |
| <i>wR</i> <sub>2</sub> (all data) <sup>b</sup>                  | 0.0843                                                         | 0.2103                                                         | 0.1854                                                         |
| GOF                                                             | 1.022                                                          | 1.094                                                          | 1.055                                                          |

<sup>a</sup>  $R_1 = \sum ||F_o| - |F_c|| / \sum |F_o|$ , <sup>b</sup>  $wR_2 = [\sum w(F_o^2 - F_c^2)^2 / \sum w(F_o^2)^2]^{1/2}$

**Table S3.** Comparison of pX adsorption selectivities reported for MOFs.

| MOF                                                                                 | $\alpha_{pXoX}$   | $\alpha_{pXmX}$   | $\alpha_{pX/(oX + mX)}$ | component  | reference |
|-------------------------------------------------------------------------------------|-------------------|-------------------|-------------------------|------------|-----------|
| <b>3C</b>                                                                           | 53.9              | 48.9              | 51.3                    | ternary    | This work |
| <b>3B</b>                                                                           | 17                | 15                | 16                      | ternary    | This work |
| <b>1B</b>                                                                           | 16                | 14                | 15                      | ternary    | This work |
| Ag <sub>4</sub> (O <sub>2</sub> CCF <sub>3</sub> ) <sub>4</sub> (phen) <sub>3</sub> | 9.13 <sup>a</sup> | 14.2 <sup>a</sup> | NA                      | binary     | [7]       |
| Cu(CDC)                                                                             | 10                | 7                 | NA                      | binary     | [8]       |
| [Nd(HTCPB)]                                                                         | NR                | 6.33              | NA                      | binary     | [9]       |
| [Ce(HTCPB)]                                                                         | 5.65              | 4.55              | NA                      | binary     | [9]       |
| MIL-125(Ti)-NH <sub>2</sub>                                                         | 2.2               | 4.4               | NA                      | binary     | [10]      |
| MIL-125(Ti)                                                                         | NR                | 3.5               | NA                      | binary     | [10]      |
| [Zn( $\mu_4$ -L)]                                                                   | 3.2               | 2.7               | 2.9                     | ternary    | [11]      |
| MAF-4 (ZIF-8)                                                                       | 3.1               | NR                | NA                      | binary     | [12]      |
| CAU-1(Al)-NH <sub>2</sub>                                                           | NR                | 2.8               | NA                      | binary     | [10]      |
| MIL-140B                                                                            | 1.8               | 1.6               | 1.7                     | quaternary | [13]      |
| MOF-48                                                                              | 1.7               | 1.7               | 1.7                     | quaternary | [13]      |

<sup>a</sup> This is not adsorption selectivity. The guests were included during the synthesis of the framework.

NR: Not reported

NA: Not available

phen = phenazine

H<sub>2</sub>CDC = *trans*-1, 4-cyclohexanedicarboxylic acid

H<sub>2</sub>TCPB = 4',5'-bis(4-carboxyphenyl)-[1,1',2',1''-terphenyl]-4,4''-dicarboxylic acid

H<sub>2</sub>L = biphenyl-3,5-dicarboxylic acid

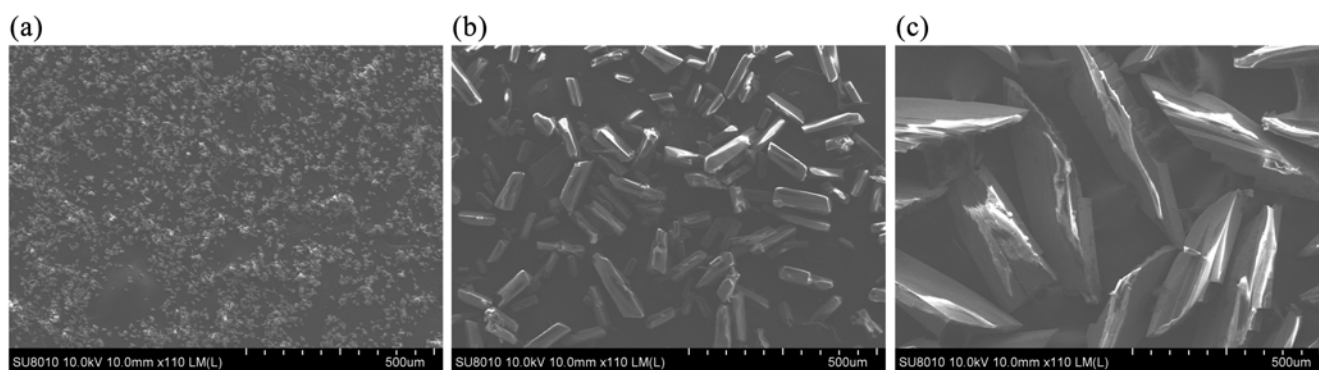

**Figure S1.** SEM images of **A**. (a) **1**, (b) **2**, and (c) **3**.

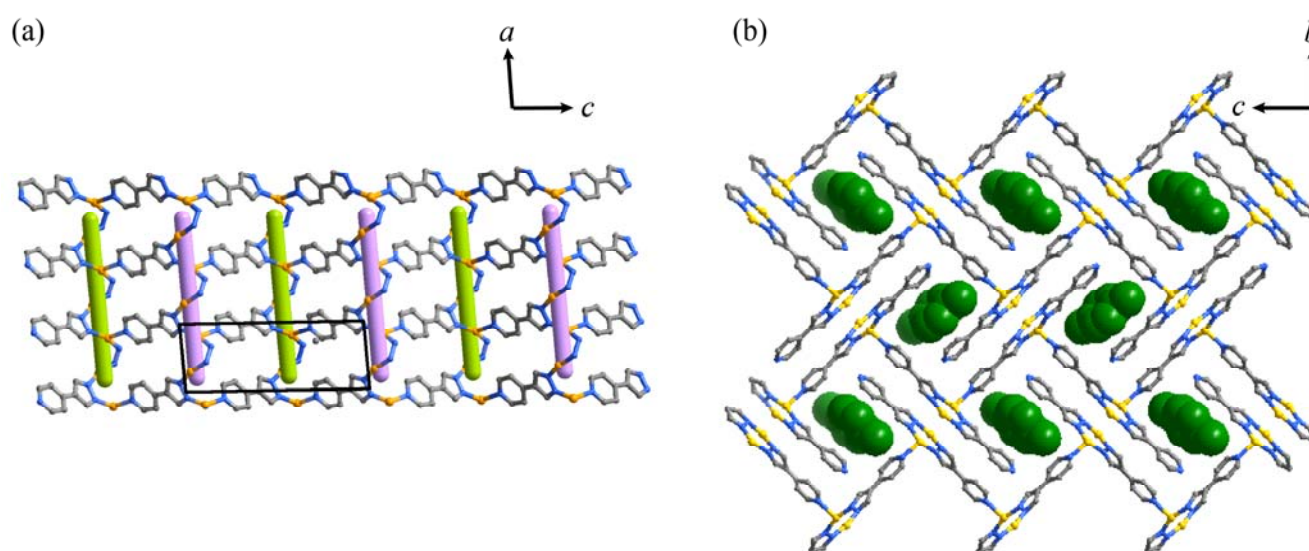

**Figure S2.** Crystal structure of **A**: (a) a zigzag coordination layer (adjacent helical chains are highlighted in olive and violet); (b) the packing structure along the channel direction (*p*-xylene molecules are shown in space-filling mode and highlighted in green).

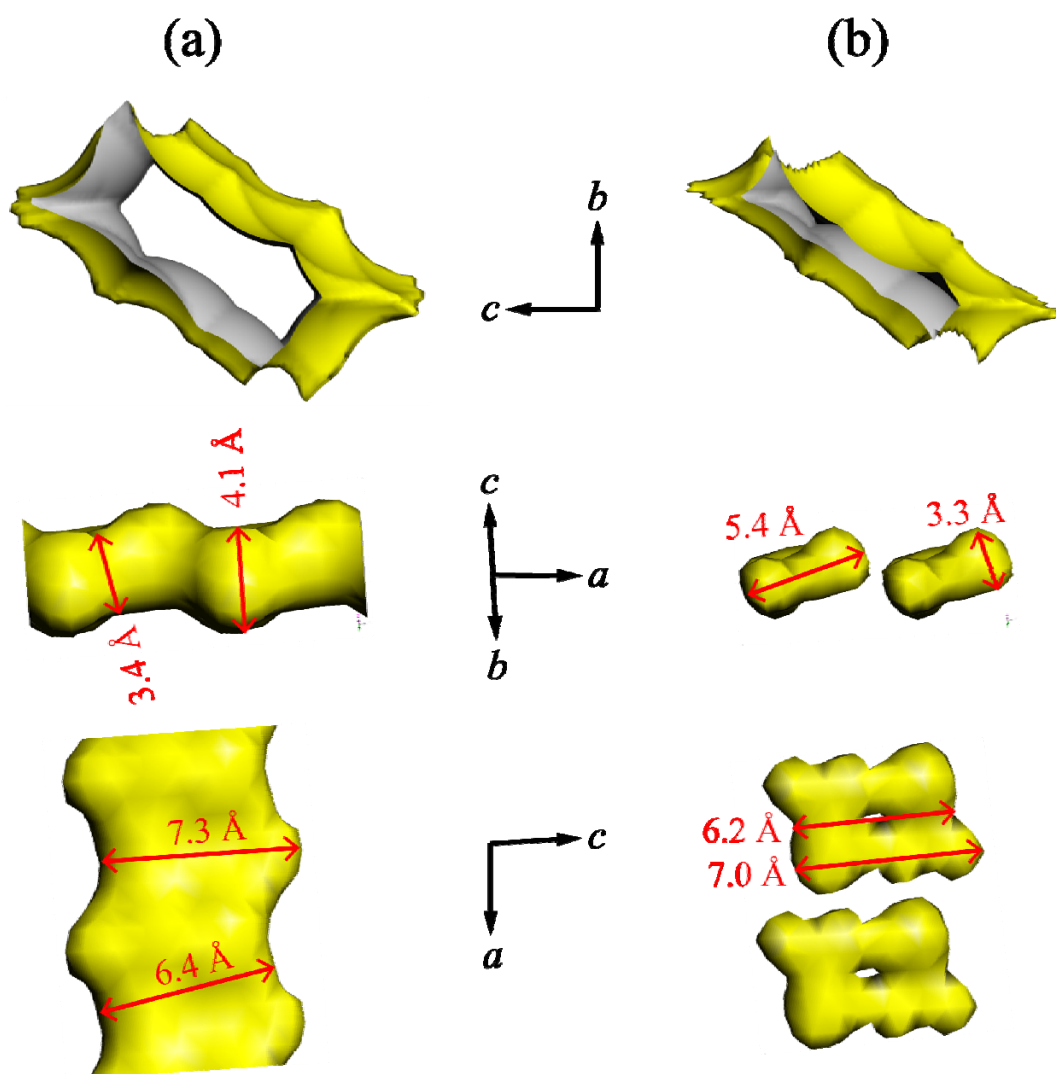

**Figure S3.** Detailed pore structures of (a) **A** and (b) **B** viewing along three typical directions (the pores shown in the top panels have are shown in the same direction as in Figure 3).

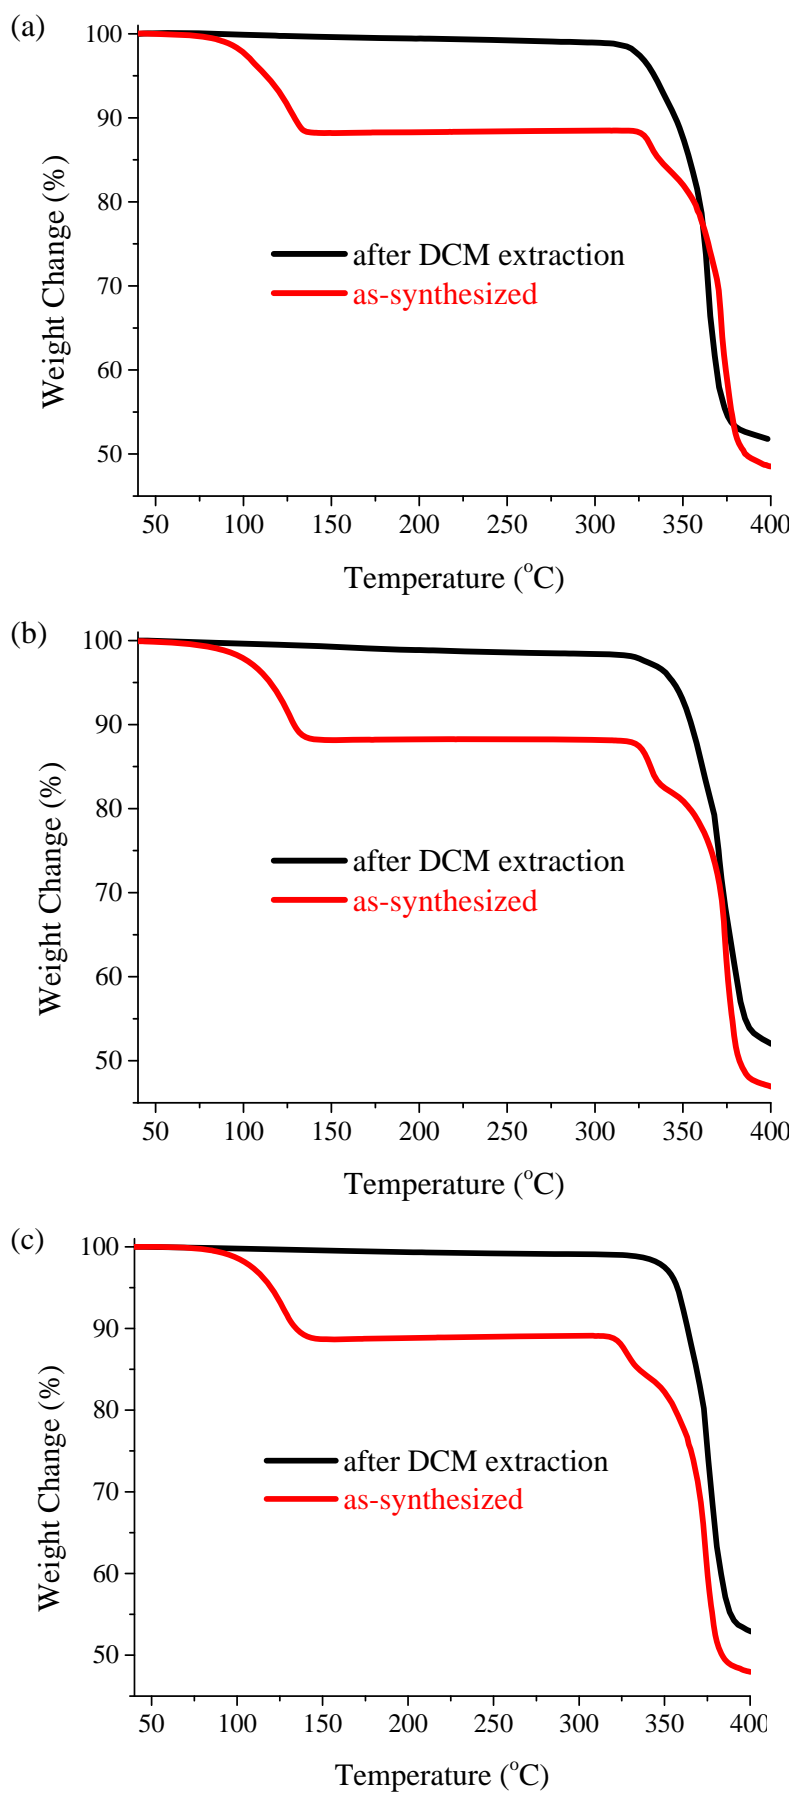

**Figure S4.** TG curves of (a) **1**, (b) **2**, and (c) **3**.



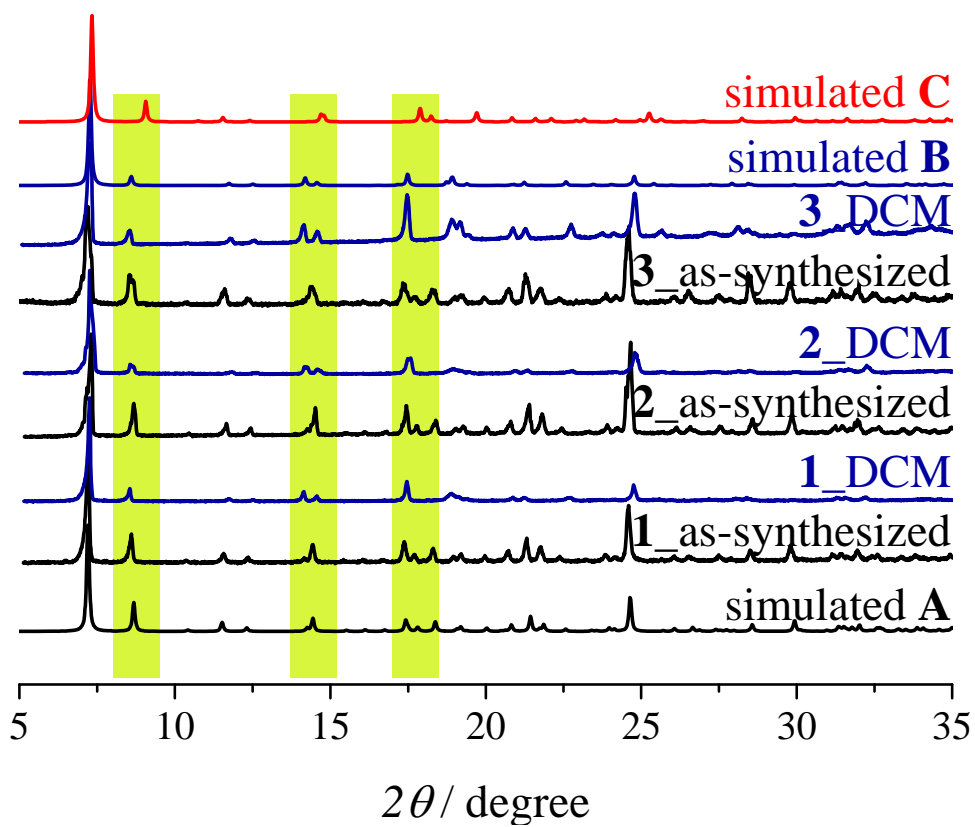

**Figure S5.** PXRD patterns of  $[\text{Cu}_2(\text{pypz})_2] \cdot 0.5\text{pX}$  (1, 2, 3) after DCM extraction.

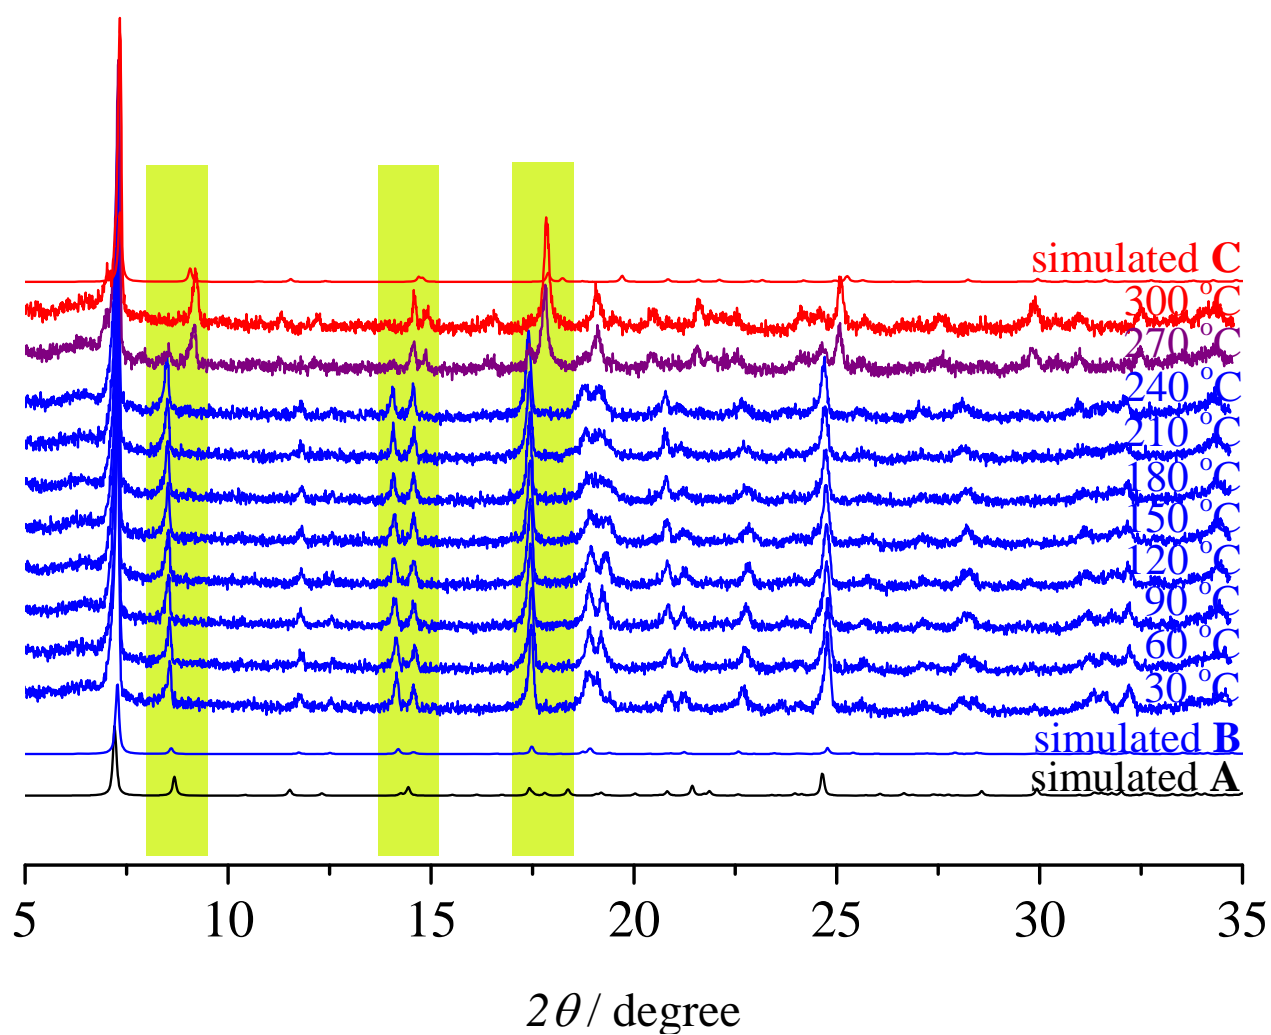

Figure S6. Magnified Figure 2d.

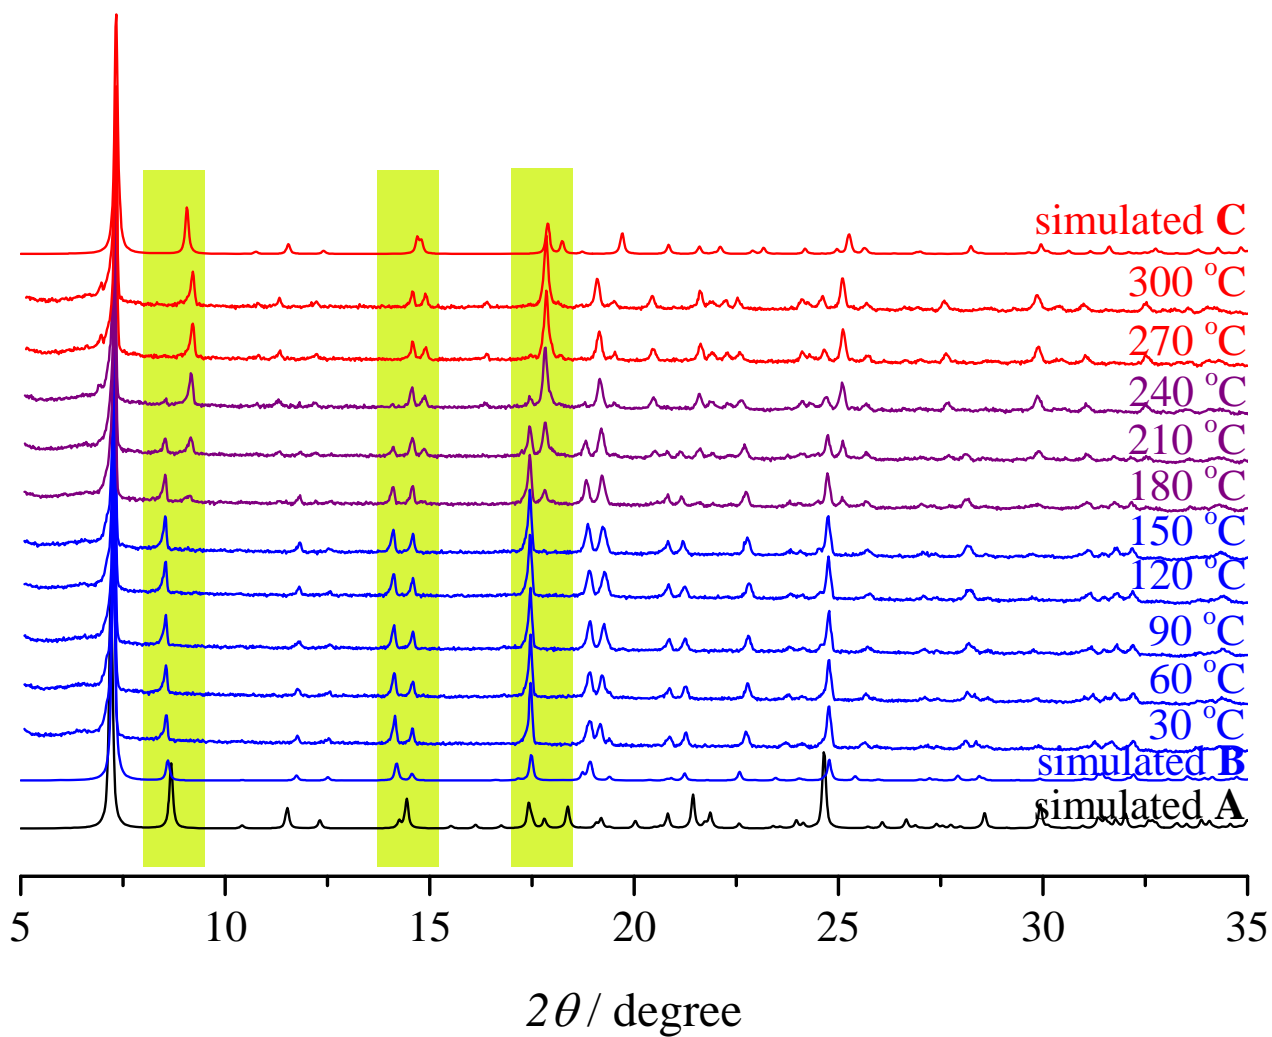

Figure S7. Magnified Figure 2e.

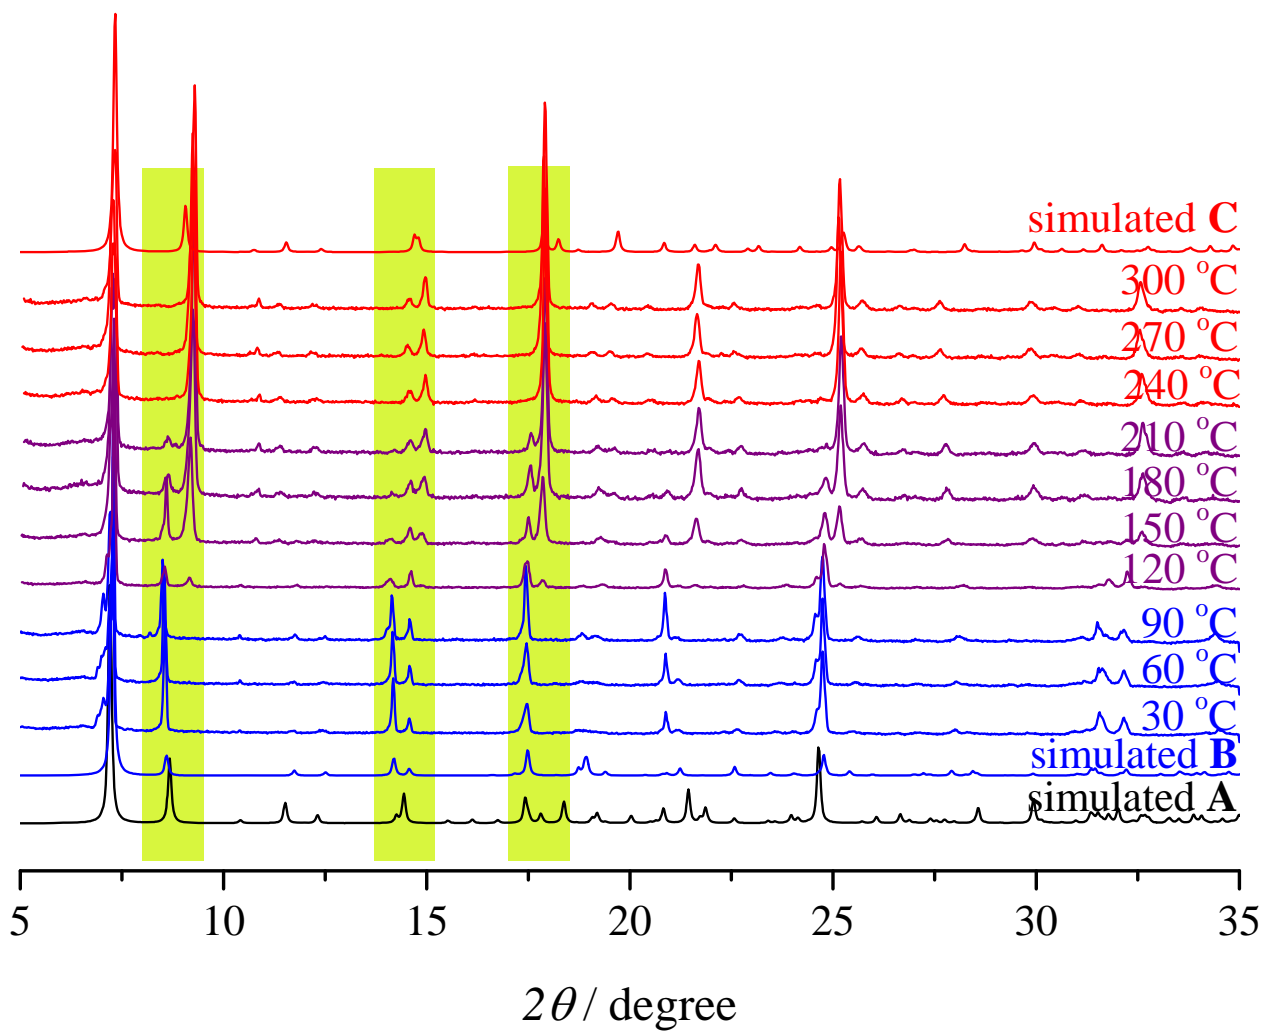

**Figure S8.** Magnified Figure 2f.

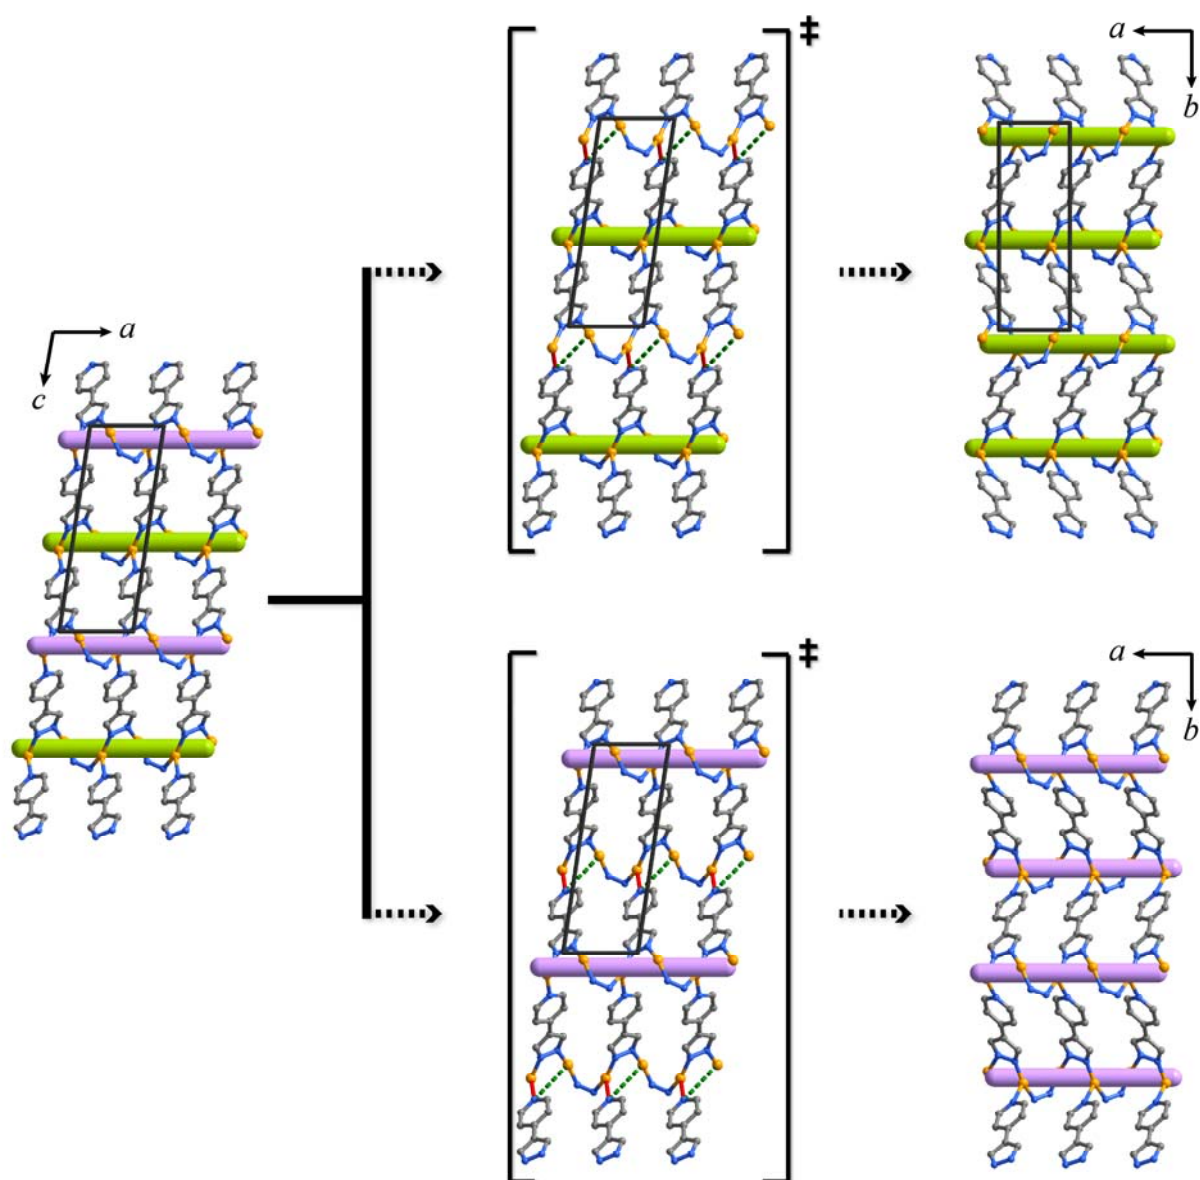

**Figure S9.** The full illustration of the proposed transformation mechanism from **B** to **C**.

|                                                                                     |                                                                                     |                                                                                      |
|-------------------------------------------------------------------------------------|-------------------------------------------------------------------------------------|--------------------------------------------------------------------------------------|
| 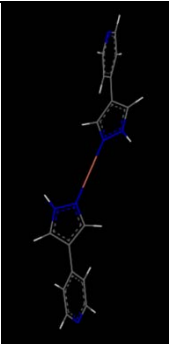 |  |  |
| $E_1 = -1168.1218953$<br>Ha                                                         | $E_2 = -472.8931741$<br>Ha                                                          | $E_3 = -1641.0536590$<br>Ha                                                          |
| $\Delta E = E_1 + E_2 - E_3 = 101.3$ kJ/mol                                         |                                                                                     |                                                                                      |

**Figure S10.** Optimized and energies of the structural fragments involved in the transformation from **B** to **C**.

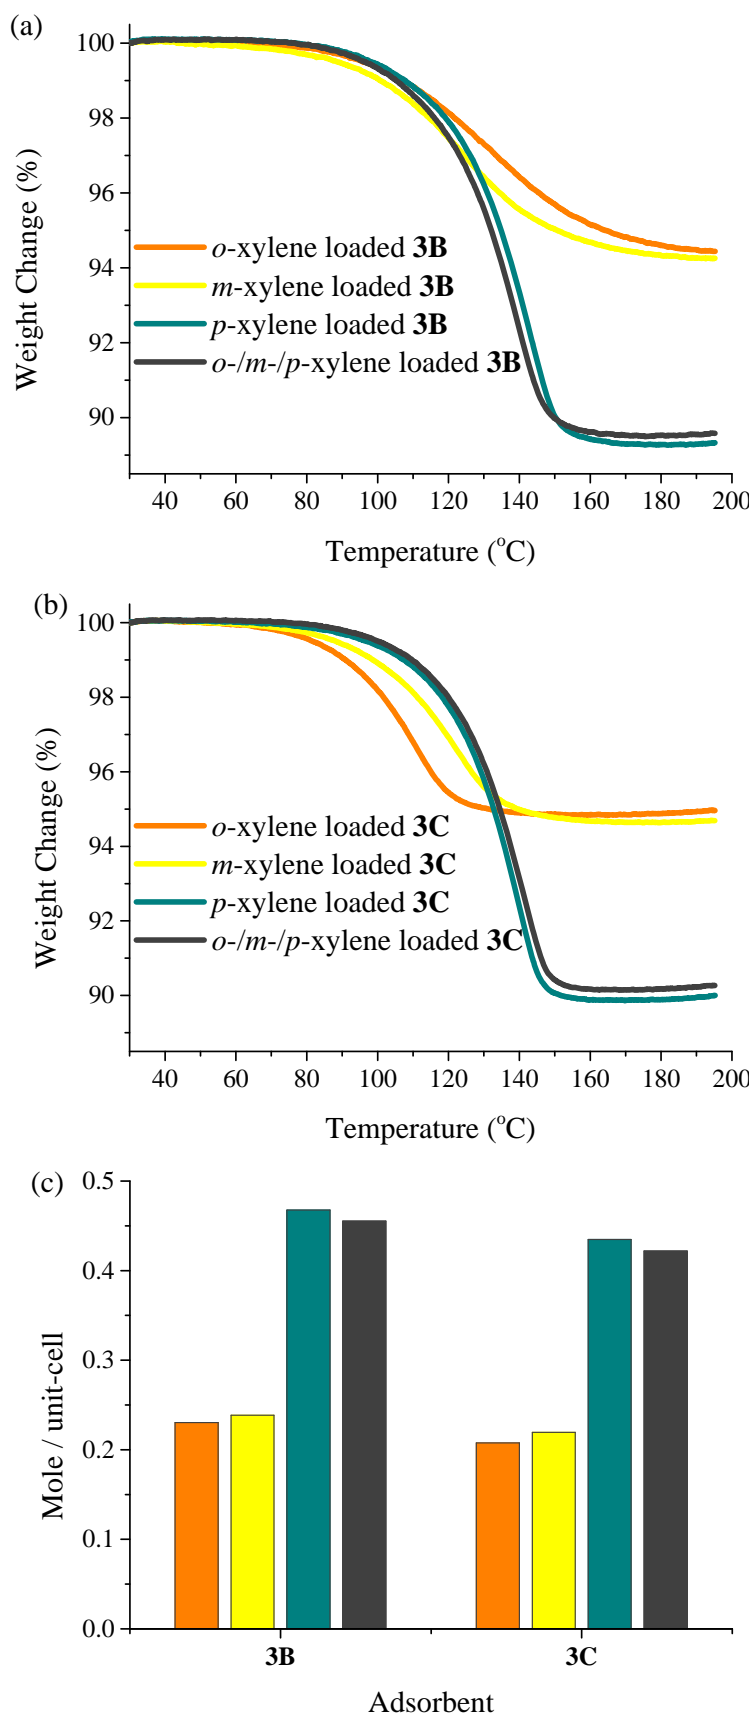

**Figure S11.** TG curves of (a) **3B** and (b) **3C** after adsorption of xylene isomers. (c) Summary of xylene uptakes. Colour scheme: *o*-xylene, orange; *m*-xylene, yellow; *p*-xylene, dark cyan; ternary xylene mixture, dark grey.

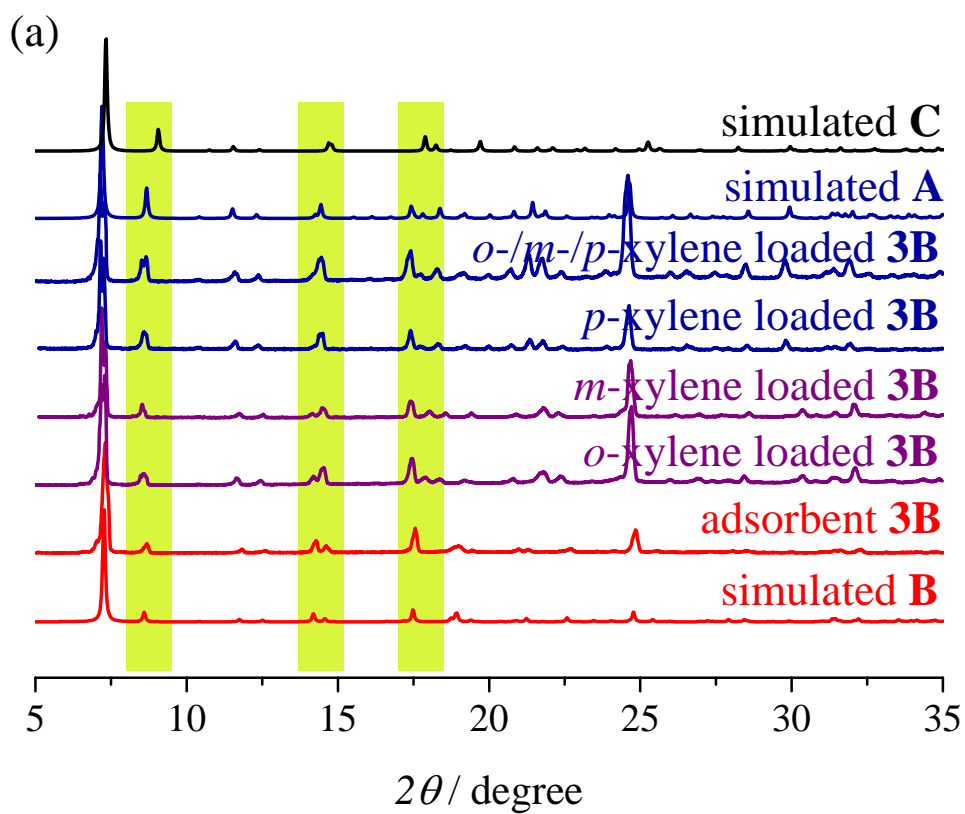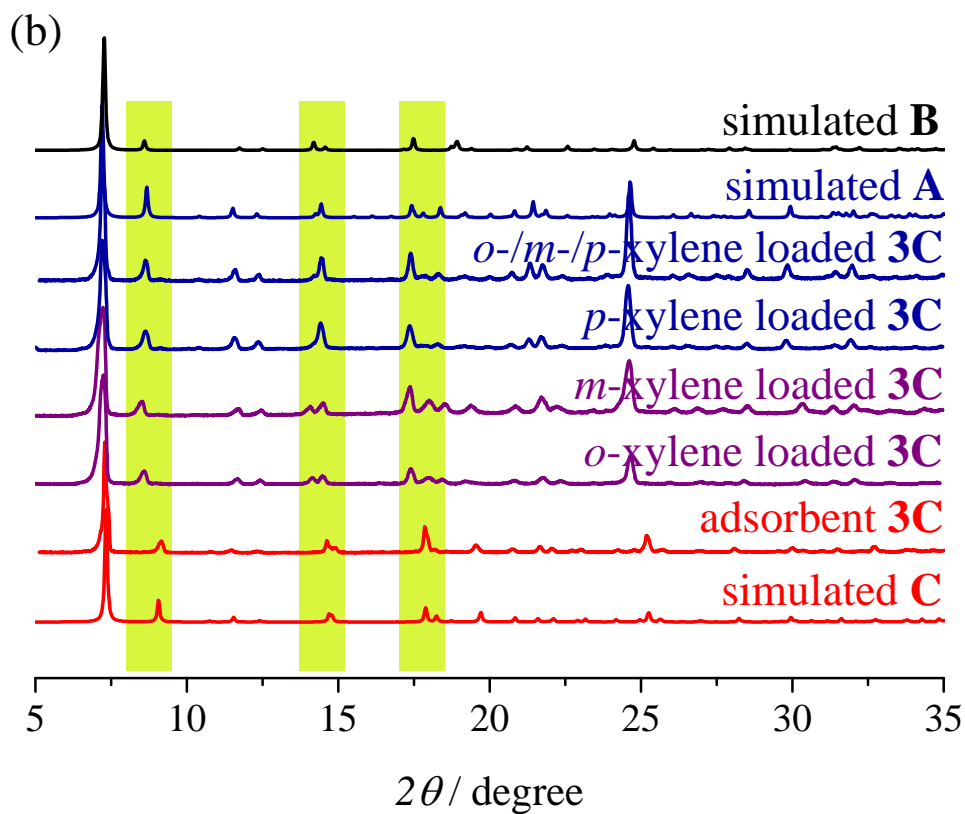

**Figure S12.** PXRD patterns of (a) 3B and (b) 3C after loaded with xylene isomers.

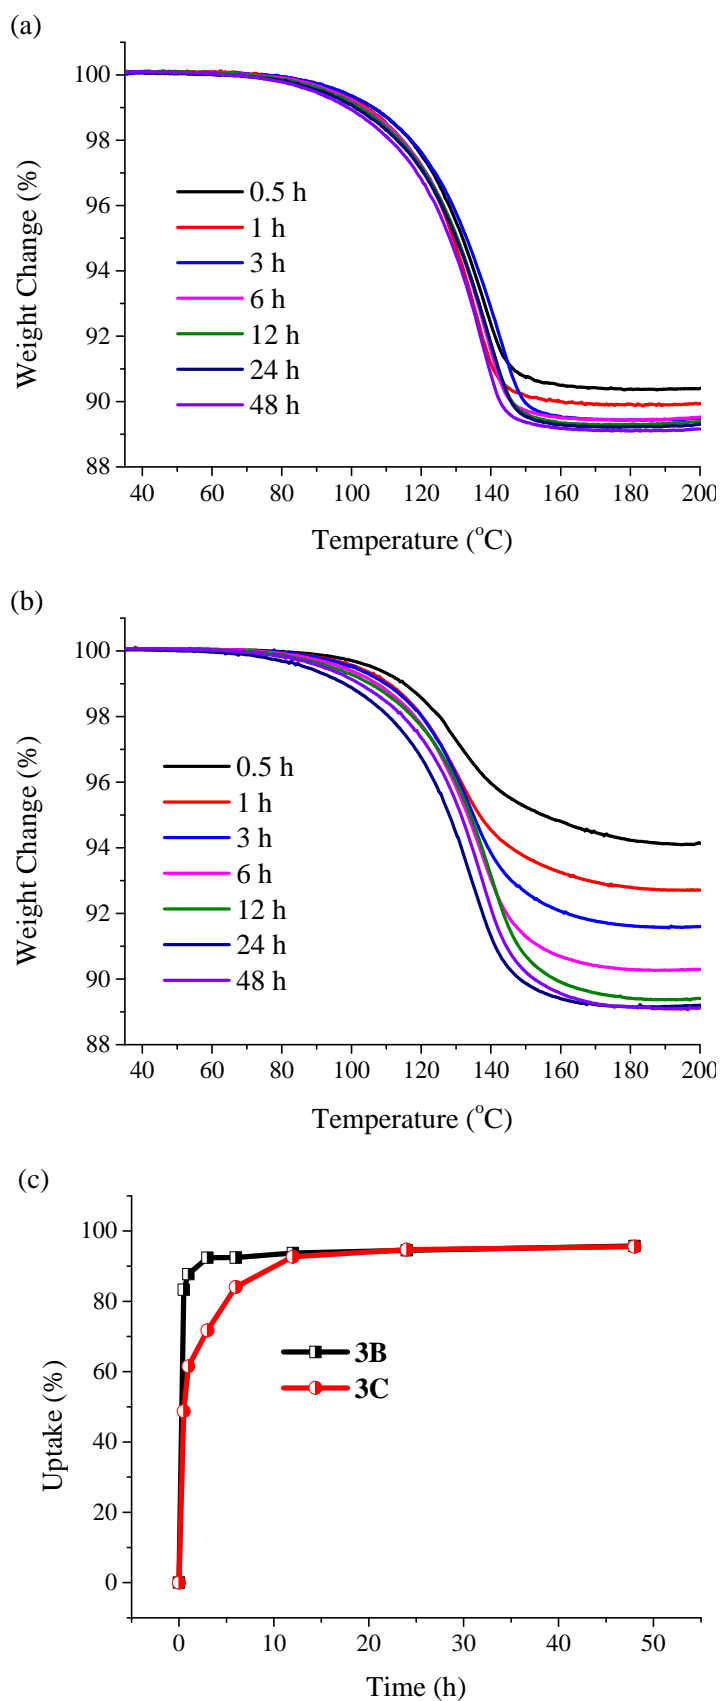

**Figure S13.** TG curves for (a) **3B** and (b) **3C** after immersion into equimolar mixture of xylene isomers for different times. (c) The corresponding adsorption kinetic profiles.



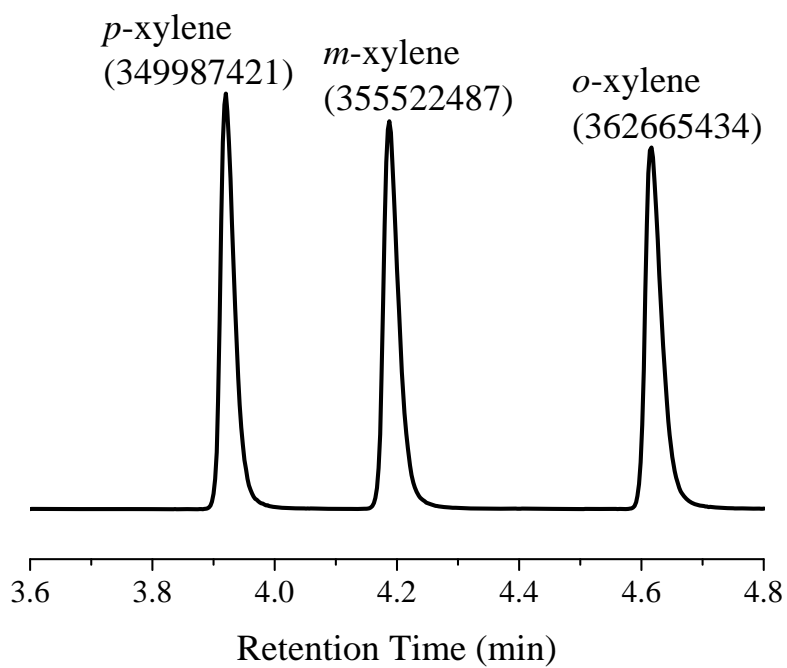

**Figure S14.** Gas chromatography curve of the *n*-heptane solution containing equimolar ternary mixture of xylene isomers. The integrated peak areas have been added in the parentheses above their corresponding peaks.

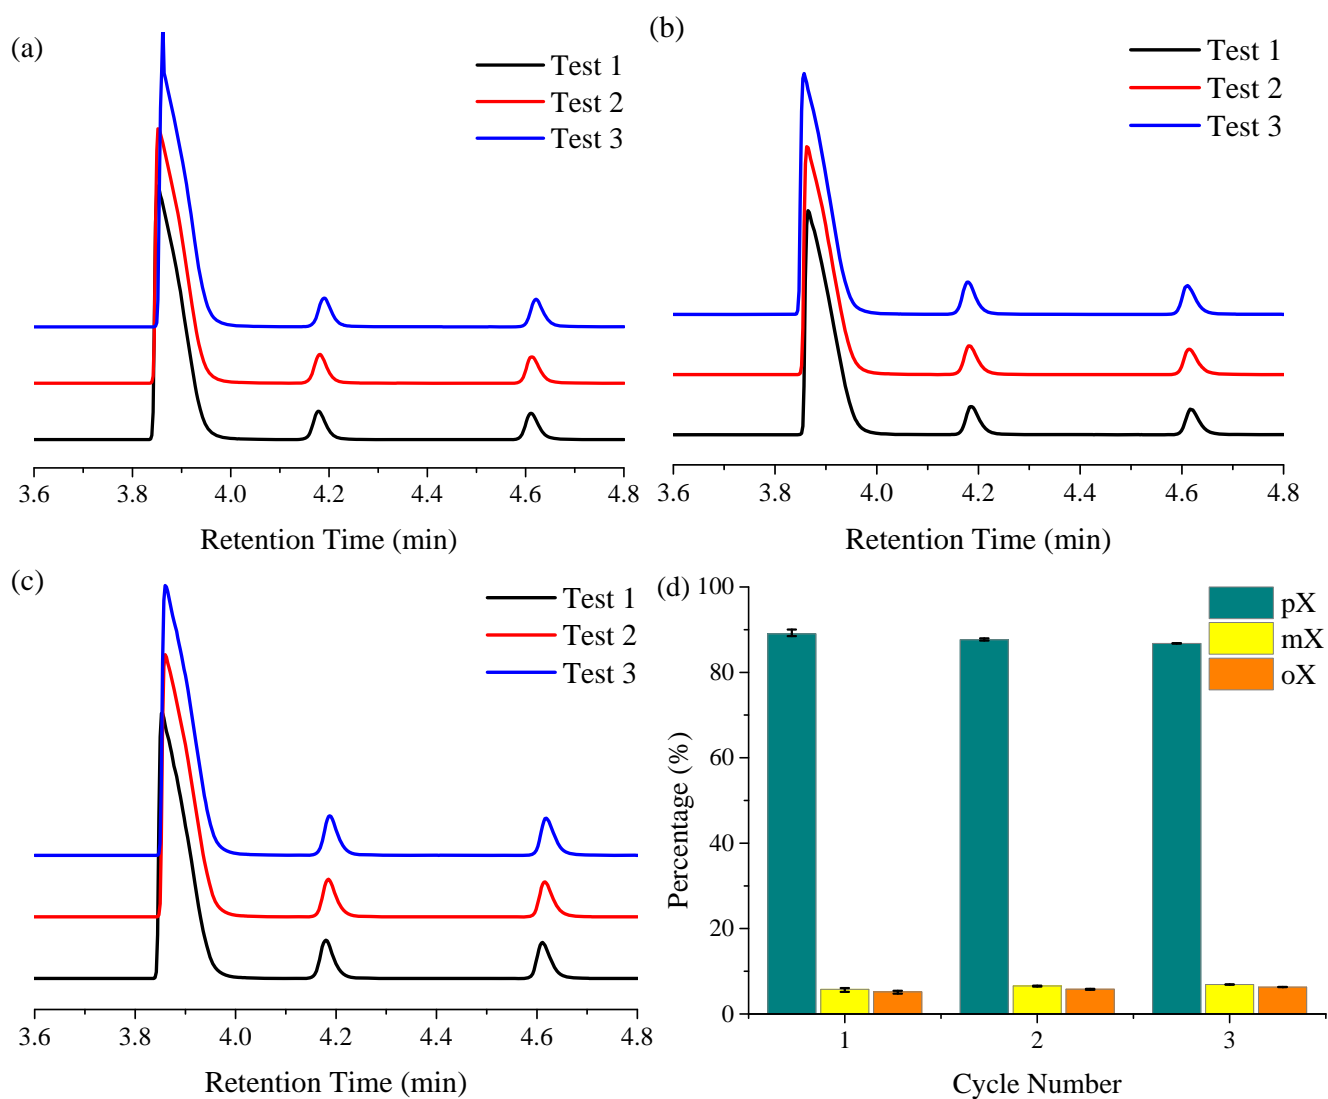

**Figure S15.** Xylene selectivities of **3B** in three consecutive ad-/desorption cycles. Gas chromatography curves of the digestion solutions of **3B** samples after immersed in equimolar mixture of xylene isomers in the (a) first, (b) second, and (c) third ad-/desorption cycle. Three parallel tests have been performed for each cycle. (d) Relative xylene isomer uptake in **3B** for three consecutive ad-/desorption cycles.

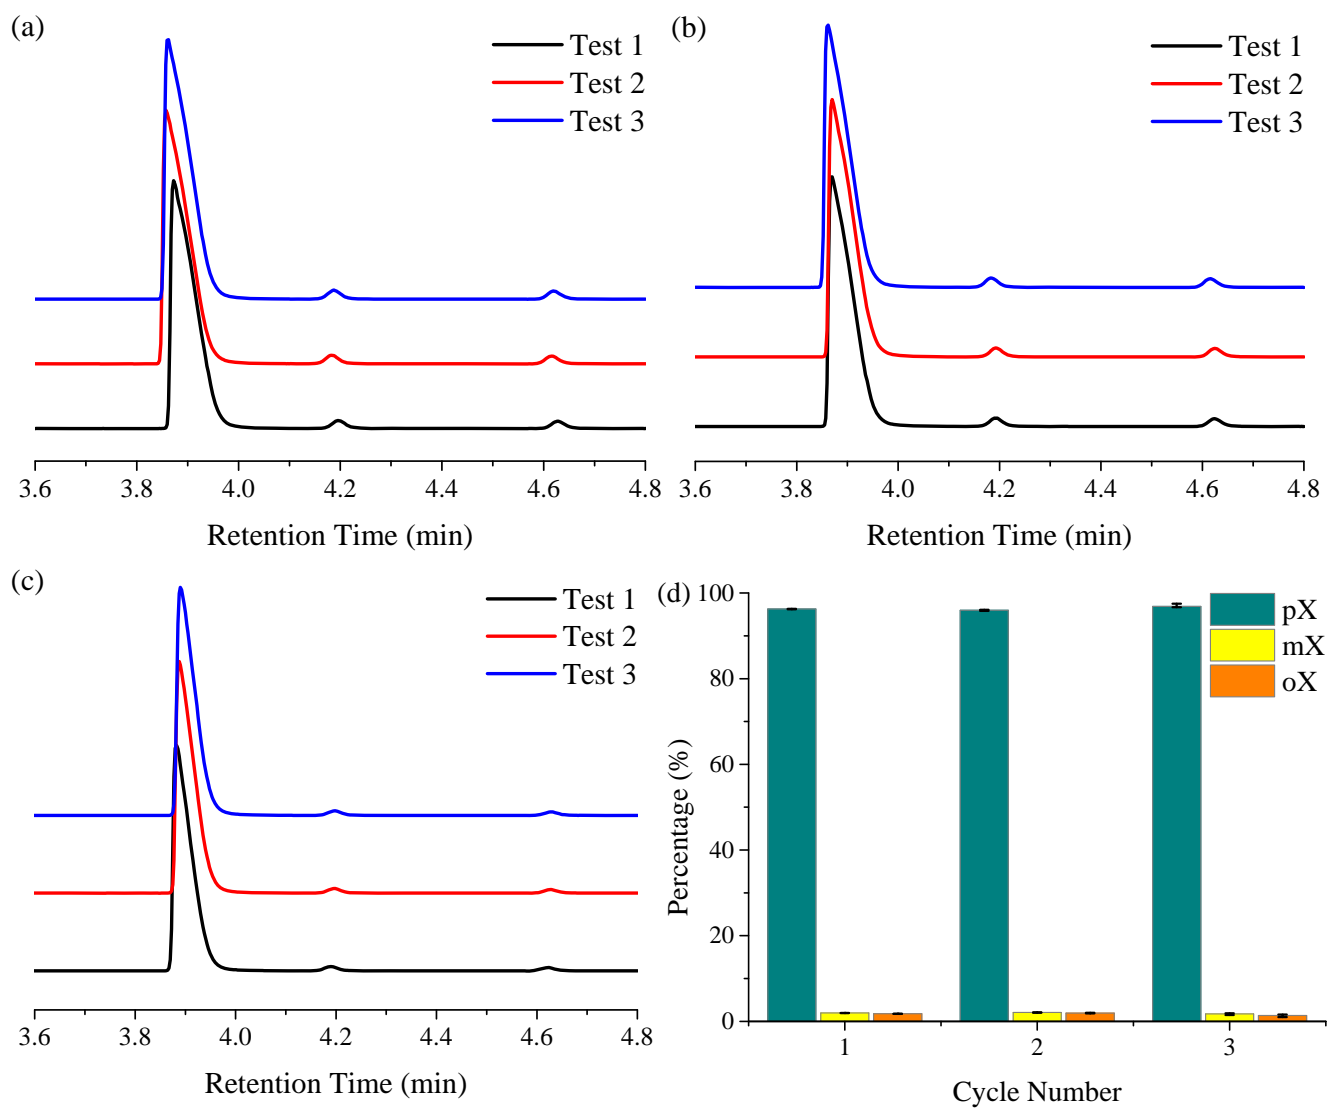

**Figure S16.** Xylene selectivities of **3C** in three consecutive ad-/desorption cycles. Gas chromatography curves of the solutions of **3C** samples after immersed in equimolar mixture of xylene isomers in the (a) first, (b) second, and (c) third ad-/desorption cycle. Three parallel tests have been performed for each cycle. (d) Relative xylene isomer uptake in **3C** for three consecutive ad-/desorption cycles.

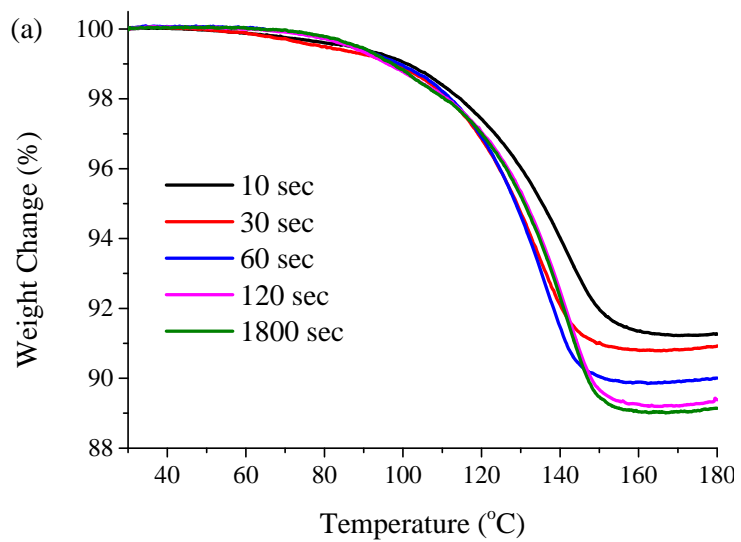

**Figure S17.** TG curves for **1B** after immersed in equimolar mixture of xylene isomers for different times.

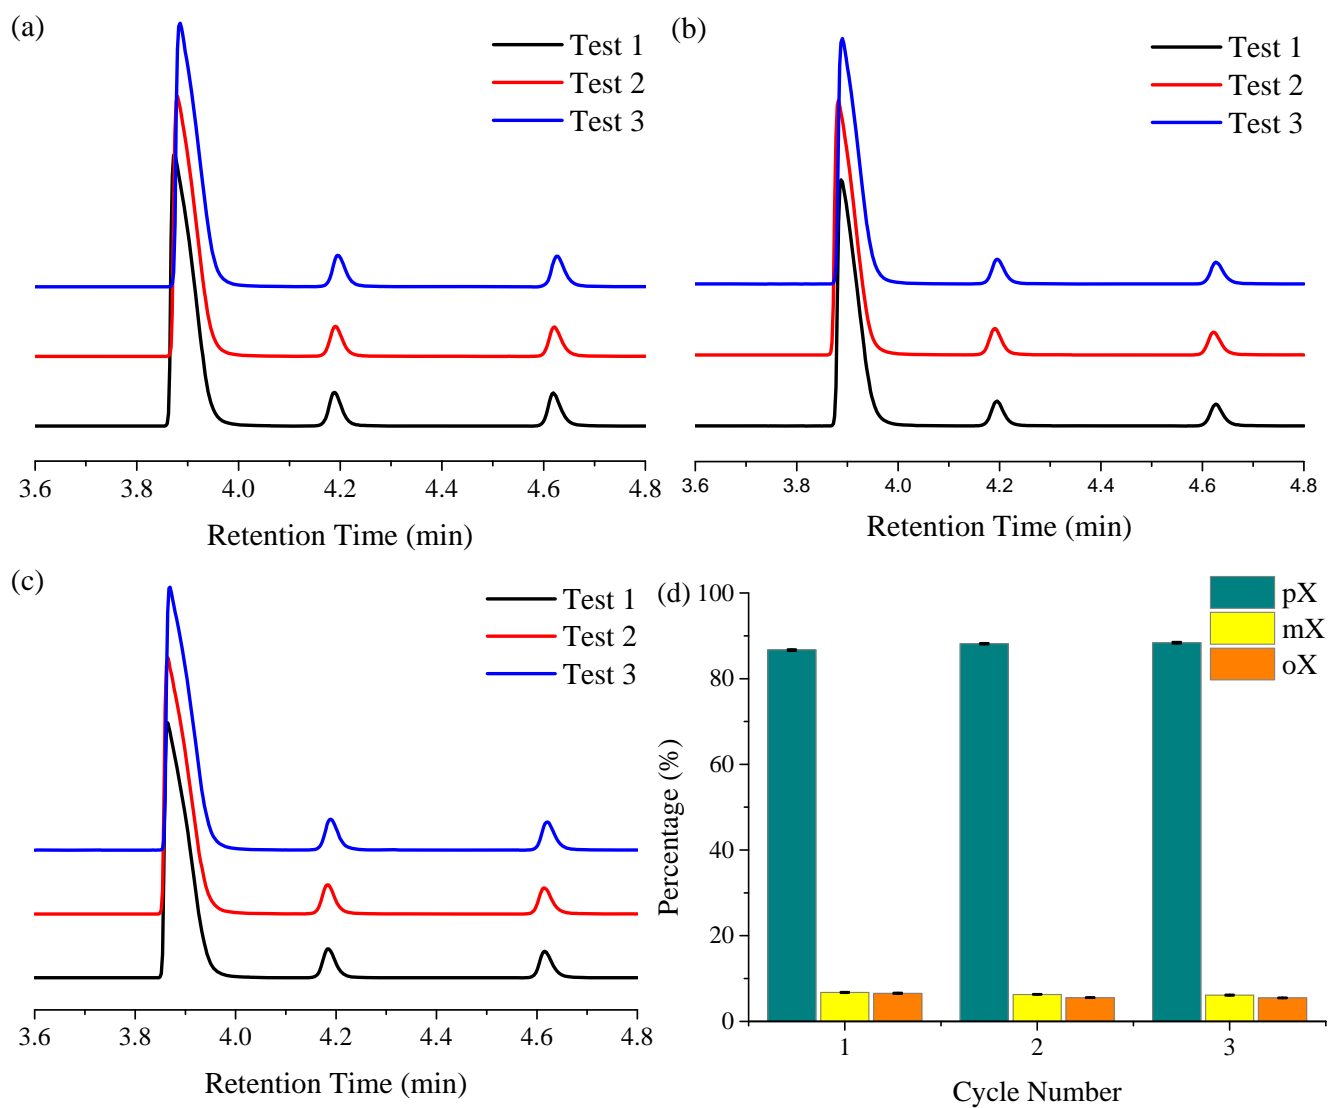

**Figure S18.** Xylene selectivities of **1B** in three consecutive ad-/desorption cycles. Gas chromatography curves of the digestion solutions of **1B** samples after immersed in equimolar mixture of xylene isomers in the (a) first, (b) second, and (c) third ad-/desorption cycle. Three parallel tests have been performed for each cycle. (d) Relative xylene isomer uptake in **1B** for three consecutive ad-/desorption cycles.

## References

- [1] S. Tanaka, K. Fujita, Y. Miyake, M. Miyamoto, Y. Hasegawa, T. Makino, S. Van der Perre, J. Cousin Saint Remi, T. Van Assche, G. V. Baron, and J. F. M. Denayer, "Adsorption and diffusion phenomena in crystal size engineered ZIF-8 MOF," *J. Phys. Chem. C*, vol. 119, no. 51, pp. 28430-28439, 2015.
- [2] C. Zhang, J. A. Gee, D. S. Sholl, and R. P. Lively, "Crystal-size-dependent structural transitions in nanoporous crystals: adsorption-induced transitions in ZIF-8," *J. Phys. Chem. C*, vol. 118, no. 35, pp. 20727-20733, 2014.
- [3] S. Krause, V. Bon, I. Senkowska, D. M. Tobbens, D. Wallacher, R. S. Pillai, G. Maurin, and S. Kaskel, "The effect of crystallite size on pressure amplification in switchable porous solids," *Nat. Commun.*, vol. 9, no. 1, pp. 1573, 2018.
- [4] Y. Sakata, S. Furukawa, M. Kondo, K. Hirai, N. Horike, Y. Takashima, H. Uehara, N. Louvain, M. Meilikhov, T. Tsuruoka, S. Isoda, W. Kosaka, O. Sakata, and S. Kitagawa, "Shape-memory nanopores induced in coordination frameworks by crystal downsizing," *Science*, vol. 339, no. 6116, pp. 193-196, 2013.
- [5] N. Kavooosi, V. Bon, I. Senkowska, S. Krause, C. Atzori, F. Bonino, J. Pallmann, S. Paasch, E. Brunner, and S. Kaskel, "Tailoring adsorption induced phase transitions in the pillared-layer type metal-organic framework DUT-8(Ni)," *Dalton Trans.*, vol. 46, no. 14, pp. 4685-4695, 2017.
- [6] Sakaida, S., K. Otsubo, O. Sakata, C. Song, A. Fujiwara, M. Takata, and H. Kitagawa, "Crystalline coordination framework endowed with dynamic gate-opening behaviour by being downsized to a thin film," *Nat. Chem.*, vol. 8, no. 4, pp. 377-83, 2016.
- [7] J. S. Wright, I. J. Vitórica-Yrezábal, S. P. Thompson, and L. Brammer, "Arene selectivity by a flexible coordination polymer host," *Chem. Eur. J.*, vol. 22, no. 37, pp. 13120-13126, 2016.
- [8] J. Lannoeye, B. Van de Voorde, B. Bozbiyik, H. Reinsch, J. F. M. Denayer, and D. De Vos, "An aliphatic copper metal-organic framework as versatile shape selective adsorbent in liquid phase separations," *Micropor. Mesopor. Mater.*, vol. 226, pp. 292-298, 2016.
- [9] J. E. Warren, C. G. Perkins, K. E. Jelfs, P. Boldrin, P. A. Chater, G. J. Miller, T. D. Manning, M. E. Briggs, K. C. Stylianou, J. B. Claridge, and M. J. Rosseinsky, "Shape selectivity by guest-driven restructuring of a porous material," *Angew. Chem. Int. Ed.*, vol. 53, no. 18, pp. 4592-4596, 2014.
- [10] F. Vermoortele, M. Maes, P. Z. Moghadam, M. J. Lennox, F. Ragon, M. Boulhout, S. Biswas, K. G. Laurier, I. Beurroies, R. Denoyel, M. Roeffaers, N. Stock, T. Duren, C. Serre, and D. E. De Vos, "p-Xylene-selective metal-organic frameworks: a case of topology-directed selectivity," *J. Am. Chem. Soc.*, vol. 133, no. 46, pp. 18526-18529, 2011.
- [11] W. Huang, J. Jiang, D. Wu, J. Xu, B. Xue, and A. M. Kirillov, "A highly stable nanotubular MOF rotator for selective adsorption of benzene and separation of xylene isomers," *Inorg. Chem.*, vol. 54, no. 22, pp. 10524-10526, 2015.
- [12] Peralta, D., G. Chaplais, A. Simon-Masseron, K. Barthelet, C. Chizallet, A. A. Quoineaud, and G. D. Pirngruber, "Comparison of the behavior of metal-organic frameworks and zeolites for hydrocarbon separations," *J. Am. Chem. Soc.*, vol. 134, no. 19, pp. 8115-26, 2012.
- [13] J. A. Gee, K. Zhang, S. Bhattacharyya, J. Bentley, M. Rungta, J. S. Abichandani, D. S. Sholl, and S. Nair, "Computational identification and experimental evaluation of metal-organic frameworks for xylene enrichment," *J. Phys. Chem. C*, vol. 120, pp. 12075-12082, 2016.
